# Supplementary material for: Central themes, core concepts and knowledge gaps concerning social media use, and mental health and well-being among adolescents: a protocol of a scoping review of published literature
Source: PubMed Central journal article supplement — BMJ Open. 2020 Jan 27;10(1):e031105. doi: 10.1136/bmjopen-2019-031105 (PMC7045249; doi:10.1136/bmjopen-2019-031105), 2020-01-27
Supplement: bmjopen-2019-031105.draft_revisions.pdf [file bmjopen-2019-031105.draft_revisions.pdf]

# BMJ Open

BMJ Open is committed to open peer review. As part of this commitment we make the peer review history of every article we publish publicly available.

When an article is published we post the peer reviewers' comments and the authors' responses online. We also post the versions of the paper that were used during peer review. These are the versions that the peer review comments apply to.

The versions of the paper that follow are the versions that were submitted during the peer review process. They are not the versions of record or the final published versions. They should not be cited or distributed as the published version of this manuscript.

BMJ Open is an open access journal and the full, final, typeset and author-corrected version of record of the manuscript is available on our site with no access controls, subscription charges or pay-per-view fees (<http://bmjopen.bmj.com>).

If you have any questions on BMJ Open's open peer review process please email [info.bmjopen@bmj.com](mailto:info.bmjopen@bmj.com)

# BMJ Open

**Central themes, core concepts and knowledge gaps concerning social media use, and mental health and well-being among adolescents. A scoping review of published literature.**

|                               |                                                                                                                                                                                                                        |
|-------------------------------|------------------------------------------------------------------------------------------------------------------------------------------------------------------------------------------------------------------------|
| Journal:                      | <i>BMJ Open</i>                                                                                                                                                                                                        |
| Manuscript ID                 | bmjopen-2019-031105                                                                                                                                                                                                    |
| Article Type:                 | Protocol                                                                                                                                                                                                               |
| Date Submitted by the Author: | 16-Apr-2019                                                                                                                                                                                                            |
| Complete List of Authors:     | Schønning, Viktor; Norwegian Institute of Public Health, Department of Health Promotion<br>Aarø, Leif; Norwegian Institute of Public Health, Division of Mental Health<br>Skogen, Jens; Nasjonalt folkehelseinstitutt, |
| Keywords:                     | MENTAL HEALTH, Child & adolescent psychiatry < PSYCHIATRY, Anxiety disorders < PSYCHIATRY, Depression & mood disorders < PSYCHIATRY                                                                                    |
|                               |                                                                                                                                                                                                                        |

SCHOLARONE™  
Manuscripts

1  
2  
3  
4  
5  
6  
7  
8  
9  
10  
11  
12  
13  
14  
15  
16  
17  
18  
19  
20  
21  
22  
23  
24  
25  
26  
27  
28  
29  
30  
31  
32

# PROTOCOL: Central themes, core concepts and knowledge gaps concerning social media use, and mental health and well-being among adolescents. A scoping review of published literature.

Authors: Viktor Schønning<sup>1</sup>, Leif Edvard Aarø<sup>1</sup> & Jens Christoffer Skogen<sup>1,2,3</sup>

<sup>1</sup>Department of Health Promotion, Norwegian Institute of Public Health, Bergen, Norway

<sup>2</sup>Alcohol and Drug Research Western Norway (KoRFor), Stavanger University Hospital, Stavanger, Norway

<sup>3</sup>Faculty of Health Sciences, University of Stavanger, Stavanger, Norway

Corresponding author: Viktor Schønning

Postal address: Norwegian Institute of Public Health,

Zander Kaaes 7, 5015 Bergen

E-mail: [Viktor.schonning@fhi.no](mailto:Viktor.schonning@fhi.no)

33  
34  
35  
36  
37  
38  
39  
40  
41  
42  
43  
44  
45  
46  
47  
48  
49  
50  
51  
52  
53  
54  
55  
56  
57  
58  
59  
60

Word count: 2068

Abstract word count: 263

## Abstract

**Introduction:** The use of social media has risen steadily since its introduction in the early 2000s, and today there are between two and three billion users worldwide. Research on the link between use of social media and mental health has resulted in a vast number of studies covering diverse aspects of the link between them. The existing body of knowledge on use of social media, and mental health and well-being among adolescents is complex and difficult-to-follow. In this paper we present a protocol for a scoping review to systematically identify and summarize the central research foci and knowledge gaps in the research field of social media use, and mental health and well-being among adolescents.

**Methods and analysis:** The current scoping review will adhere to the PRISMA-ScR (Preferred Reporting Items for Systematic reviews and Meta-Analyses extension for Scoping Reviews). The first step is to search relevant databases for eligible studies. Next, two reviewers from the research team will independently screen the identified studies for eligibility. Data extraction and data synthesis will be performed and result in summarized themes based on the findings.

**Ethics and dissemination:** A scoping review can be described as a method of gaining an overview and understanding of a research area, with its strengths and weaknesses, and as it involves peer-reviewed and published articles, a scoping review does not require ethical approval. We expect that the results from the current scoping review will produce a consolidated overview of existing studies and research gaps, and gather this knowledge into a coherent review. The results will be disseminated through relevant journals and conferences.

Keywords: scoping review; social media; mental health; adolescence; well-being

## Article summary

### Strengths and limitations of this study:

- This will be the first scoping review to systematically identify and summarize the central research foci and knowledge gaps in the research field of social media use, and mental health and well-being among adolescents.
- The search strategy includes several electronic databases with published peer-reviewed literature, with an aim to cover all relevant research publications.
- Initial selection of articles will be done by two reviewers independently.
- Data extraction from included articles will be done by two reviewers independently to ensure the quality of the collected information.
- Being a scoping review, no formal assessment of study quality will be carried out.

## Background

Social media is a relatively new phenomenon with an increasing popularity. The number of social media users worldwide has increased rapidly the last years, reaching 2 billion in 2015 and is estimated to reach 3 billion users in 2021 [1]. Social media include services such as Facebook, Twitter, Snapchat and Instagram, with Facebook being the largest social media based on the number of users, followed by YouTube and WhatsApp [2, 3]. Young adults are more likely than older adults to use social media, with the demographic of users varying slightly between type of media [4]. The effects of increased social media use on youth health are still largely unknown, though some studies indicate detrimental effects on mental health [3]. A US survey from 2016 found a significant association between social media use and increased depression, but the mechanisms and direction of the association were not identified [5]. A systematic narrative review reports contradictory findings with both beneficial and harmful effects of social media use [6]. Given the research interest in the link between adolescents' social media use, and mental health and well-being, the planned scoping review will establish an overview over the existing body of knowledge and contribute to advance this field of research. Given the recency of the phenomenon, it is vital to identify and describe core themes as well as knowledge gaps when it comes to the effect of social media use on adolescent's mental health and well-being. The realm of social media is complex and multi-layered with several stakeholders, and a scoping review would help provide a foundation for further research, and in time also for policymaking and service delivery.

The purpose of scoping reviews can be described as a way of mapping "the key concepts underpinning a research area, and the main sources and types of evidence available, and can be undertaken as standalone projects in their own right, especially where an area is complex or has not been reviewed comprehensively before" [7]. In our context, a scoping review will help provide an understanding of the "big picture" and the main foci of research within the field of social media and mental health and well-being among adolescents, as well as the data sources and research instruments typically used. By utilizing the scoping review approach, the current study aims to produce a consolidated overview of studies with diverging methodological designs and gather this knowledge into a coherent review. Furthermore, one of the most frequent reasons for conducting a scoping review is to identify gaps in the research literature [8]. A vast number of studies on social media use and mental health has been conducted over the last decade, but to the authors' knowledge no scoping review has yet been carried out.

The review described here will follow the framework put forward by Arksey and O'Malley, which can be described according to five steps: 1) identifying the research question, 2) identifying relevant studies, 3) selecting studies, 4) charting the data, and 5) collating, summarising and reporting the results [8].

## Aims

This scoping review aims to give an overview of the main research questions that have been focused on in relation to use of social media among adolescents and mental health and well-being. Both quantitative and qualitative studies are of interest. Three specific secondary research questions will be addressed:

- Investigate which aspects of mental health and well-being have been the focus or foci of research so far.
- Investigate if the research have focused on different research aims across gender or reported different findings across gender.
- Organise and describe the main sources of evidence related to social media that have been used in the quantitative studies identified.

## Defining adolescence and social media

In the present review, adolescence is defined as those between 13 and 19 years of age. All pertinent studies which present results relevant for this age range is within the scope of this review. Social media is a broad term that is difficult to pin down. We have chosen to use the following definition offered by Kietzmann and colleagues (2011, page 1): "Social media employ mobile and web-based technologies to create highly interactive platforms via which individuals and communities share, co-create, discuss, and modify user-generated content" [9]. This definition can be applied to Kaplan and Haenlein's [10] classification scheme that specify types of social media across two axes – *social presence/media richness* and *self-presentation/self-disclosure* (see figure 1).

|           |      | Social presence/media richness |                                               |                                            |
|-----------|------|--------------------------------|-----------------------------------------------|--------------------------------------------|
|           |      | Lower                          | Medium                                        | Higher                                     |
| Self-pres | High | Blogs                          | Vlogs/Social networking sites (e.g. Facebook) | Virtual social worlds (e.g. Second Life, ) |

|                              |     |                                            |                                               |                                                                     |
|------------------------------|-----|--------------------------------------------|-----------------------------------------------|---------------------------------------------------------------------|
| entation/<br>Self-disclosure | Low | Collaborative projects<br>(e.g. Wikipedia) | Content communities (e.g.<br>Twitch, YouTube) | Virtual game worlds<br>(e.g. League of<br>Legends, Apex<br>Legends) |
|------------------------------|-----|--------------------------------------------|-----------------------------------------------|---------------------------------------------------------------------|

**Figure 1: Characteristics of social media across the axes social presence/media richness and self-presentation/self-disclosure. Adapted from Kaplan and Haenlein [9].**

The chosen definition of social media exclude other use of electronic or web-based media or programs, such as medical or health-related services (e.g. monitoring devices or medical reference), one-way transmissions of content (e.g. podcasts) and real-time exchanges via technology (e.g. Skype). We also exclude joint projects involving via technology (e.g. Microsoft Whiteboard). Online discussion forums and bulletin boards will however be included, as the content is at least partly generated by the users.

## Data sources and search strategy

The following data sources were chosen due to their scope that include social sciences and public health research: Ovid Medline, Embase, PsycINFO, Sociological Abstracts, Sociological Services Abstracts, ERIC, Cochrane Database of Systematic Reviews, CRD (Database of Abstracts of Reviews of Effects), NHS EED, HTA and Epistemonikos. The search terms included combinations of different variants of 'adolescent', 'mental health', 'well-being' and 'social media', and only studies published the last five years were eligible. The snowballing technique will be used to identify articles that are not covered by our search, but only for studies published after 2014 [11]. Publisher and journals will be assessed for legitimacy according to the relevant criteria described by the Directory of Open Access Journals (DOAJ; for open access publications) and other relevant sources [12].

## Study selection: Exclusion and inclusion criteria

### Inclusion

- English
- Peer-reviewed papers
- Published within the last 5 years (since 2014)
- Participants/Informants aged between 13-19 years
- Empirical studies of primary research
- Observational or participatory studies
- Systematic reviews (and meta-analyses)
- Explicit focus on mental health, social support, sleep and/or well-being
- Explicit focus on social media



## Exclusion

- Editorials, opinion pieces, commentaries
- Study or review protocols
- Book chapters
- Publications not peer-reviewed
- Non-empirical studies
- Theoretical studies, perspective articles
- Specific populations such as individuals with chronic illness or physical or mental disabilities
- Specific sub-populations, minority groups
- Intervention studies
- Treatment studies
- Internet- or app-based therapy
- Unpublished studies/conference proceedings
- Not within our definition of social media
- Studies where social media is only used as a moderator
- Studies which focus on internet gambling
- Clinical case-reports
- Studies focusing on the use of online information
- Studies focusing on aggression and violence (beyond cyber bullying)
- Studies focusing on brain disorders/cognitive disorders
- Studies focusing on information processing, decision-making or personality

The initial criteria used for study selection are part of an iterative process [13], and we will follow a two-stage approach:

- 1) Learning and adjusting stage: Two reviewers will independently screen titles and abstracts of 300 randomly drawn studies for eligibility. The purpose of this stage is to clarify the initial inclusion criteria, and to identify any uncertainties related to the inclusion and exclusion of papers. A third independent reviewer can be consulted if necessary. Adjustments will be made if deemed necessary.
- 2) Final selection stage: Two reviewers will independently screen titles and abstracts of all studies for eligibility according to the revised and updated inclusion and exclusion criteria. The full text of studies assessed as 'relevant' or 'unclear' will then be independently evaluated by two reviewers. The interrater agreement will be computed and discrepancies will be resolved by consensus or if necessary, by adjudication by a third independent reviewer.

1  
2  
3 The selection process will be illustrated by a flow-chart indicating the stages from unsorted search  
4 results to the total number of included studies. Study selection will be accomplished and organised  
5 using the Rayyan QCRI software (<https://rayyan.qcri.org/welcome>).  
6  
7  
8  
9  
10

## 11 Data extraction and organisation

12  
13  
14  
15 Data extraction will be done for all included papers by one reviewer. A randomly drawn proportion  
16 (5-10% depending on the total number of included papers) of these papers will also be assessed by a  
17 second reviewer to ensure adherence to the data extraction plan as well as assessment of the quality  
18 of the extraction. Data will be extracted according to the following details:  
19  
20  
21

- 22 • Bibliographic information
  - 23 ○ Author information
  - 24 ○ Title
  - 25 ○ Journal
  - 26 ○ Year of publication
  - 27 ○ Country of corresponding author
- 28 • Information about study design
  - 29 ○ Quantitative or qualitative
  - 30 ○ Study design
  - 31 ○ Study setting
  - 32 ○ Participants
  - 33 ○ Gender distribution
- 34 • Subject matter information
  - 35 ○ Main aim of study
  - 36 ○ Type of social media use
  - 37 ○ How social media use was assessed
  - 38 ○ Mental health or well-being measure
  - 39 ○ Report gender differences
  - 40 ○ Main finding/conclusion (free text)
  - 41 ○ Type of scales used (only applicable in quantitative studies)

42  
43  
44  
45  
46  
47  
48  
49 Data extraction and synthesis will be accomplished and organised using an electronic data  
50 spreadsheet.  
51

## 52 Data synthesis: Quantification and narrative approach

53  
54  
55 The extracted data will first submitted to simple quantitative analysis using descriptive statistics  
56 (frequencies and measures of central tendencies) with purpose of providing an overview of the main  
57 characteristics of the included studies [7]. The data will also be narratively assessed with a focus on  
58  
59  
60

1  
2  
3 the core themes and concepts emerging from the extracted data. This thematic analysis will be  
4 performed by two reviewers independently, guided by three main axes:

- 5  
6  
7 1) **Mental health:** Which aspects of mental health were focussed in each study?
- 8  
9 2) **Social media:** What type of social media use was the focus of the study? Typology will be  
10 based on Kaplan and Haenlein's [10] classification scheme.
- 11  
12 3) **Type of study:** Was the study qualitative or quantitative?

13  
14 The results will be compared and consolidated by consensus between the two reviewers. The  
15 resulting themes will be reviewed by a third independent reviewer to ensure validity and credibility.  
16 The themes will be reported to highlight the similarities, patterns and differences found in the  
17 literature, using a content-based approach.  
18  
19  
20  
21  
22

## 23 Presentation of the results

24  
25 The purpose of scoping reviews is to aggregate and synthesise data in order to gain an overview of a  
26 field of research. Our results will be presented in tables and visual illustrations (e.g. graphs and  
27 figures) and according to the emerging themes from the analyses described above. The exact  
28 presentation format will be further specified as the review process develops [8]. The current scoping  
29 review will strive to adhere to the PRISMA-ScR (Preferred Reporting Items for Systematic reviews and  
30 Meta-analyses extension for Scoping Reviews) as presented by Tricco and colleagues [14].  
31  
32  
33  
34  
35  
36

## 37 Ethical considerations and dissemination of knowledge gained

38  
39 This protocol is a transparent description of the planned methodology for a scoping review. Our  
40 aspiration is that this protocol will lay the groundwork for a comprehensive and rigorous review that  
41 can contribute to the advancement of research related to adolescents, social media, mental health  
42 and well-being. The review will contribute to the advancement of research on this subject by  
43 identifying central research themes and gaps in knowledge and research. The results will be  
44 disseminated through publications as well as presentations at relevant conferences. Furthermore,  
45 our results may inform new research and policy initiatives addressing the subject matter.  
46  
47  
48  
49  
50  
51  
52

## 53 Acknowledgements

54  
55 The authors would like to thank Bergen municipality, Hordaland County Council and Western Norway  
56 University of Applied Sciences for their collaboration and help with the review.  
57  
58  
59  
60

## Funding

This review is partly funded by Regional Research Funds in Norway [15], funding #RFF297031. No other specific funding was received for the present project. The present project is associated with a larger innovation-project lead by Bergen municipality in Western Norway related to the use of social media and mental health and well-being. The innovation-project is funded by a programme initiated by the Norwegian Directorate of Health, and aims to explore social media as platform for health-promotion among adolescents [16].

## Conflicts of interests

None.

## Author statement

All authors, VS, LEA and JCS, have made substantive intellectual contributions to the development of this protocol. JCS conceptualised the review approach, provided general guidance to the research team, and drafted the first version. VS developed the draft further, and all authors were involved in further revisions of the draft, review questions and the review design. All authors approve the final version of the manuscript.

## Data statement

Data statement not applicable.

## References

1. eMarketer. *Number of social media users worldwide from 2010 to 2021 (in billions)*. 2017 [cited 2019 March 21]; Available from: <https://www.statista.com/statistics/278414/number-of-worldwide-social-network-users/>.
2. DataReportal. *Most popular social networks worldwide as of January 2019, ranked by number of active users (in millions)*. 2019 [cited 2019 March 21]; Available from: <https://www.statista.com/statistics/272014/global-social-networks-ranked-by-number-of-users/>.
3. Han, B., *Social media burnout: Definition, measurement instrument, and why we care*. Journal of Computer Information Systems, 2018. **58**(2): p. 122-130.
4. Duggan, M. and J. Brenner, *The demographics of social media users - 2012*. 2013, Washington, DC: Pew Research Center's Internet & American Life Project.
5. Lin, L.Y., et al., *Association between social media use and depression among US young adults*. Depression and anxiety, 2016. **33**(4): p. 323-331.
6. Best, P., R. Manktelow, and B. Taylor, *Online communication, social media and adolescent wellbeing: A systematic narrative review*. Children and Youth Services Review, 2014. **41**: p. 27-36.
7. Mays, N., E. Roberts, and J. Popay, *Synthesising research evidence*, in *Methods for studying the delivery and organisation of health services*, N. Fulop, et al., Editors. 2001, Routledge: London.
8. Arksey, H. and L. O'Malley, *Scoping studies: towards a methodological framework*. International journal of social research methodology, 2005. **8**(1): p. 19-32.
9. Kaplan, A.M. and M. Haenlein, *Users of the world, unite! The challenges and opportunities of Social Media*. Business horizons, 2010. **53**(1): p. 59-68.
10. Kietzmann, J.H., et al., *Social media? Get serious! Understanding the functional building blocks of social media*. Business horizons, 2011. **54**(3): p. 241-251.
11. Sayers, A., *Tips and tricks in performing a systematic review*. British Journal of General Practice, 2007. **57**(542): p. 759.
12. Laine, C. and M.A. Winker, *Identifying predatory or pseudo-journals*. Biochemia medica, 2017. **27**(2): p. 285-291.
13. Levac, D., H. Colquhoun, and K.K. O'Brien, *Scoping studies: advancing the methodology*. Implementation science, 2010. **5**(1): p. 69.
14. Tricco, A.C., et al., *PRISMA extension for scoping reviews (PRISMA-ScR): checklist and explanation*. Annals of internal medicine, 2018. **169**(7): p. 467-473.
15. Norges forskningsråd. *Regional research funds in Norway*. 2012 [cited 2019 March 25]; Available from: [https://www.forskningsradet.no/servlet/web/prognett-rff-hovedside/RFF\\_in\\_English/1253976860326](https://www.forskningsradet.no/servlet/web/prognett-rff-hovedside/RFF_in_English/1253976860326).
16. HelseDirektoratet. *Program for folkehelsearbeid i kommunene*. 2018 [cited 2019 March 25]; Available from: <https://helsedirektoratet.no/folkehelse/folkehelsearbeid-i-kommunen/program-for-folkehelsearbeid-i-kommunene>.

# BMJ Open

**Central themes, core concepts and knowledge gaps concerning social media use, and mental health and well-being among adolescents. A protocol of a scoping review of published literature.**

|                                 |                                                                                                                                                                                                                     |
|---------------------------------|---------------------------------------------------------------------------------------------------------------------------------------------------------------------------------------------------------------------|
| Journal:                        | <i>BMJ Open</i>                                                                                                                                                                                                     |
| Manuscript ID                   | bmjopen-2019-031105.R1                                                                                                                                                                                              |
| Article Type:                   | Protocol                                                                                                                                                                                                            |
| Date Submitted by the Author:   | 10-Oct-2019                                                                                                                                                                                                         |
| Complete List of Authors:       | Schønning, Viktor; Norwegian Institute of Public Health, Department of Health Promotion<br>Aarø, Leif; Norwegian Institute of Public Health, Division of Mental Health Skogen, Jens; Nasjonalt folkehelseinstitutt, |
| <b>Primary Subject Heading</b>: | Public health                                                                                                                                                                                                       |
| Secondary Subject Heading:      | Public health, Health policy                                                                                                                                                                                        |
| Keywords:                       | MENTAL HEALTH, Child & adolescent psychiatry < PSYCHIATRY, Anxiety disorders < PSYCHIATRY, Depression & mood disorders < PSYCHIATRY                                                                                 |
|                                 |                                                                                                                                                                                                                     |

SCHOLARONE™  
Manuscripts

1  
2  
3  
4  
5 1 Central themes, core concepts and  
6  
7  
8  
9 2 knowledge gaps concerning social  
10  
11  
12  
13 3 media use, and mental health and  
14  
15  
16  
17 4 well-being among adolescents. A  
18  
19  
20  
21 5 protocol of a scoping review of  
22  
23  
24  
25 6 published literature.  
26

27 7 Authors: Viktor Schønning<sup>1</sup>, Leif Edvard Aarø<sup>1</sup> & Jens Christoffer Skogen<sup>1,2,3</sup>  
28  
29  
30  
31 8  
32 9

33 10 <sup>1</sup>Department of Health Promotion, Norwegian Institute of Public Health, Bergen, Norway

34 11 <sup>2</sup>Alcohol and Drug Research Western Norway (KoRFor), Stavanger University Hospital, Stavanger,  
35 12 Norway

36 13 <sup>3</sup>Faculty of Health Sciences, University of Stavanger, Stavanger, Norway  
37 14  
38 15  
39 16  
40 17  
41 18  
42 19  
43 20  
44 21  
45 22  
46 23  
47 24  
48  
49  
50  
51  
52  
53  
54  
55  
56  
57  
58  
59  
60

Corresponding author: Viktor Schønning

Postal address: Norwegian Institute of Public Health,

Zander Kaaes gate 7, 5015 Bergen

E-mail: [Viktor.schonning@fhi.no](mailto:Viktor.schonning@fhi.no)

Word count: 2491

Abstract word count: 263

## 25 Abstract

26 **Introduction:** The use of social media has risen steadily since its introduction in the early 2000s, and  
27 today there are between two and three billion users worldwide. Research on the link between use of  
28 social media and mental health has resulted in a vast number of studies covering diverse aspects of  
29 the link between them. The existing body of knowledge on use of social media, and mental health  
30 and well-being among adolescents is complex and difficult-to-follow. In this paper we present a  
31 protocol for a scoping review to systematically identify and summarize the central research foci and  
32 knowledge gaps in the research field of social media use, and mental health and well-being among  
33 adolescents.

34 **Methods and analysis:** The current scoping review will adhere to the PRISMA-ScR (Preferred  
35 Reporting Items for Systematic reviews and Meta-Analyses extension for Scoping Reviews). The first  
36 step is to search relevant databases for eligible studies. Next, two reviewers from the research team  
37 will independently screen the identified studies for eligibility. Data extraction and data synthesis will  
38 be performed and result in summarized themes based on the findings.

39 **Ethics and dissemination:** A scoping review can be described as a method of gaining an overview and  
40 understanding of a research area, with its strengths and weaknesses, and as it involves peer-  
41 reviewed and published articles, a scoping review does not require ethical approval. We expect that  
42 the results from the current scoping review will produce a consolidated overview of existing studies  
43 and research gaps, and gather this knowledge into a coherent review. The results will be  
44 disseminated through relevant journals and conferences.

45  
46 Keywords: scoping review; social media; mental health; adolescence; well-being

47



## 48 Article summary

### 49 Strengths and limitations of this study:

- 50 • A strength of the current study is that it will be the first scoping review to systematically  
51 identify and summarize the central research foci and knowledge gaps in the research field of  
52 social media use, and mental health and well-being among adolescents in both qualitative  
53 and quantitative studies. In an effort to cover most of the research field, social media is  
54 broadly defined, and mental health and well-being is not restricted to any particular disorder  
55 or system cluster.
- 56 • Another strength is that the search strategy includes several electronic databases with  
57 published peer-reviewed literature, with an aim to cover all relevant research publications.
- 58 • Initial selection of articles will be done by two reviewers independently which is considered a  
59 strength of the study.
- 60 • It is considered a strength that data extraction from included articles will be done by two  
61 reviewers independently to ensure the quality of the collected information.
- 62 • Being a scoping review, no formal assessment of study quality will be carried out. This is  
63 considered a limitation of the current study.

64

## 65 Background

66 Social media is a relatively new phenomenon with an increasing popularity. The number of social  
67 media users worldwide has increased rapidly the last years, reaching 2 billion in 2015 and is  
68 estimated to reach 3 billion users in 2021 [1]. Among youth aged 12-15 years in the UK, 99 % go  
69 online for at least 20 hours a week and 69 % gave a social media profile according to an rapport on  
70 media use [2]. Today, social media use is ubiquitous in adolescents worldwide regardless of  
71 differences such as culture, geographic region or socioeconomic status. Social media include services  
72 such as Facebook, Twitter, Snapchat and Instagram, with Facebook being the largest social media  
73 based on the number of users, followed by YouTube and WhatsApp [3, 4]. Young adults are more  
74 likely than older adults to use social media, with the demographic of users varying slightly between  
75 type of media [5]. The effects of increased social media use on youth health are still largely unknown,  
76 though some studies indicate detrimental effects on mental health [4]. A US survey from 2016 found  
77 a significant association between social media use and increased depression, but the mechanisms  
78 and direction of the association were not identified [6]. A systematic narrative review reports  
79 contradictory findings with both beneficial and harmful effects of social media use [7]. There is  
80 currently an ongoing debate regarding the strength of the association between adolescent well-being  
81 and the use of digital technology and social media with Twenge and colleagues being adamant about  
82 its negative impact [8]. On the other side, Przybylski and colleagues have found that the association  
83 between digital technology use and adolescent well-being is negative but only explaining 0.4 % of the  
84 variation in well-being, and they suggest that these effects are too small to warrant any policy  
85 change [9]. The possibility that concerns regarding social media use may be exaggerated is also  
86 suggested by Berryman and colleagues in their study from 2018 [10]. There is also the possibility that  
87 the issue of moral panic is contributing to misrepresenting the detrimental effects of social media  
88 use on adolescents well-being, a phenomenon which has been heavily discussed regarding the  
89 effects of introducing new media technologies such as video games, TV and radio [11]. It is, however,  
90 difficult to pinpoint if moral panic exists and what role it plays in presenting the evidence of social  
91 media use on well-being. Given the research interest in the link between adolescents' social media  
92 use, and mental health and well-being, the planned scoping review will establish an overview over  
93 the existing body of knowledge and contribute to advance this field of research. Given the recency of  
94 the phenomenon, it is vital to identify and describe core themes as well as knowledge gaps when it  
95 comes to the effect of social media use on adolescent's mental health and well-being. The realm of  
96 social media is complex and multi-layered with several stakeholders and a constantly changing  
97 technological landscape. The content of social media is both user-generated and commercially  
98 generated and there are often both corporate and public interests and stake-holders in the

1  
2  
3 99 phenomenon. A scoping review would help provide a foundation for further research, which in time  
4  
5 100 will provide a knowledge base for policymaking and service delivery.

6 101 The purpose of scoping reviews can be described as a way of mapping “the key concepts  
7  
8 102 underpinning a research area, and the main sources and types of evidence available, and can be  
9  
10 103 undertaken as standalone projects in their own right, especially where an area is complex or has not  
11  
12 104 been reviewed comprehensively before” [12]. In our context, a scoping review will help provide an  
13  
14 105 understanding of the “big picture” and the main foci of research within the field of social media and  
15  
16 106 mental health and well-being among adolescents, as well as the data sources and research  
17  
18 107 instruments typically used. By utilizing the scoping review approach, the current study aims to  
19  
20 108 produce a consolidated overview of studies with diverging methodological designs and gather this  
21  
22 109 knowledge into a coherent review. Furthermore, one of the most frequent reasons for conducting a  
23  
24 110 scoping review is to identify gaps in the research literature [13]. A vast number of studies on social  
25  
26 111 media use and mental health has been conducted over the last decade, but to the authors’  
27  
28 112 knowledge no scoping review has yet been carried out.

29  
30 113 The review described here will follow the framework put forward by Arksey and O’Malley, which can  
31  
32 114 be described according to five steps: 1) identifying the research question, 2) identifying relevant  
33  
34 115 studies, 3) selecting studies, 4) charting the data, and 5) collating, summarising and reporting the  
35  
36 116 results [13].

## 37 117 Aims

38  
39 118 This scoping review aims to give an overview of the main research questions that have been focused  
40  
41 119 on in relation to use of social media among adolescents and mental health and well-being. Both  
42  
43 120 quantitative and qualitative studies are of interest. Three specific secondary research questions will  
44  
45 121 be addressed and together with the main research question serve as a template for organizing the  
46  
47 122 results:

- 48 123 • Which aspects of mental health and well-being have been the focus or foci of research so  
49  
50 124 far?
- 51 125 • Has the research focused on different research aims across gender, ethnicity, socio-economic  
52  
53 126 status, geographic location? What kind of findings are reported across these groups?
- 54  
55 127 • Organise and describe the main sources of evidence related to social media that have been  
56  
57 128 used in the studies identified.

## 129 Defining adolescence and social media

130 In the present review, adolescence is defined as those between 13 and 19 years of age. We chose the  
 131 age of 13 as our lower limit as nearly all social media services require users to be at least 13 years of  
 132 age to access and use their services [14]. This includes Facebook, Snapchat, Twitter, Instagram and  
 133 Skype [14]. All pertinent studies which present results relevant for this age range is within the scope  
 134 of this review. Social media is a broad term that is difficult to pin down. We have chosen to use the  
 135 following definition offered by Kietzmann and colleagues (2011, page 1): “Social media employ  
 136 mobile and web-based technologies to create highly interactive platforms via which individuals and  
 137 communities share, co-create, discuss, and modify user-generated content” [16]. This definition can  
 138 be applied to Kaplan and Haenlein’s [15] classification scheme that specify types of social media  
 139 across two axes – *social presence/media richness* and *self-presentation/self-disclosure* (see table 1).

|                                           |      | Social presence/media richness          |                                               |                                                            |
|-------------------------------------------|------|-----------------------------------------|-----------------------------------------------|------------------------------------------------------------|
|                                           |      | Lower                                   | Medium                                        | Higher                                                     |
| Self-<br>presentation/Self-<br>disclosure | High | Blogs                                   | Vlogs/Social networking sites (e.g. Facebook) | Virtual social worlds (e.g. Second Life, )                 |
|                                           | Low  | Collaborative projects (e.g. Wikipedia) | Content communities (e.g. Twitch, YouTube)    | Virtual game worlds (e.g. League of Legends, Apex Legends) |

141 **Table 1: Characteristics of social media across the axes social presence/media richness and self-**  
 142 **presentation/self-disclosure. Adapted from Kaplan and Haenlein [15].**

143 The chosen definition of social media excludes other use of electronic or web-based media or  
 144 programs, such as medical or health-related services (e.g. monitoring devices or medical reference),  
 145 one-way transmissions of content (e.g. podcasts) and real-time exchanges via technology (e.g.  
 146 Skype). We also exclude joint projects involving via technology (e.g. Microsoft Whiteboard). Online  
 147 discussion forums and bulletin boards will however be included, as the content is at least partly  
 148 generated by the users.

## 149 Data sources and search strategy

150 The following data sources were chosen due to their scope that include social sciences and public  
 151 health research: CINAHL, Ovid Medline, Embase, PsycINFO, Sociological Abstracts, Sociological

1  
2  
3 152 Services Abstracts, ERIC, Cochrane Database of Systematic Reviews, CRD (Database of Abstracts of  
4  
5 153 Reviews of Effects), NHS EED, HTA and Epistemonikos. The search terms included combinations of  
6  
7 154 different variants of 'adolescent', 'mental health', 'well-being' and 'social media', and only studies  
8  
9 155 published the last five years were eligible. This limited search period was chosen mainly due to rapid  
10  
11 156 changes in the use and types of use of social media. Findings more than five years old were therefore  
12  
13 157 deemed to be less relevant to shed light on our research questions. There were also practical reasons  
14  
15 158 to limiting our search to 2014, related to available resources. The start-date for the search was April  
16  
17 159 2019, with additional searches in May 2019. The snowballing technique will be used to identify  
18  
19 160 articles that are not covered by our search, but only for studies published after 2014 [17]. Publisher  
20  
21 161 and journals will be assessed for legitimacy according to the relevant criteria described by the  
22  
23 162 Directory of Open Access Journals (DOAJ; for open access publications) and other relevant sources  
24  
25 163 [18].

## 164 Study selection: Exclusion and inclusion criteria

### 165 Inclusion

- 166 • English
- 167 • Peer-reviewed papers
- 168 • Published within the last 5 years (since 2014)
- 169 • Participants/Informants aged between 13-19 years
- 170 • Empirical studies of primary research
- 171 • Observational or participatory studies
- 172 • Systematic reviews (and meta-analyses)
- 173 • Explicit focus on mental health, sleep and/or well-being
- 174 • Explicit focus on social media

### 175 Exclusion

- 176 • Editorials, opinion pieces, commentaries
- 177 • Study or review protocols
- 178 • Book chapters
- 179 • Publications not peer-reviewed
- 180 • Non-empirical studies
- 181 • Theoretical studies, perspective articles
- 182 • Specific (sub-)populations such as individuals with chronic illness or physical or mental  
183 disabilities
- 184 • Specific sub-populations, minority groups
- 185 • Intervention studies
- 186 • Treatment studies

- 187 • Internet- or app-based therapy
- 188 • Unpublished studies/conference proceedings
- 189 • Not within our definition of social media
- 190 • Studies where social media is only used as a moderator
- 191 • Studies which focus on internet gambling
- 192 • Clinical studies or clinical case-reports
- 193 • Studies focusing on the use of online information
- 194 • Studies focusing on aggression and violence (beyond cyber bullying)
- 195 • Studies focusing on brain disorders/cognitive disorders
- 196 • Studies focusing on information processing, decision-making or personality

197 The initial criteria used for study selection are part of an iterative process [19], and we will follow a  
198 two-stage approach:

- 199 1) Learning and adjusting stage: Two reviewers will independently screen titles and abstracts of  
200 300 randomly drawn studies for eligibility. The purpose of this stage is to clarify the initial  
201 inclusion criteria, and to identify any uncertainties related to the inclusion and exclusion of  
202 papers. A third independent reviewer can be consulted if necessary. Adjustments will be  
203 made if deemed necessary.
- 204 2) Final selection stage: Two reviewers will independently screen titles and abstracts of all  
205 studies for eligibility according to the revised and updated inclusion and exclusion criteria.  
206 The full text of studies assessed as 'relevant' or 'unclear' will then be independently  
207 evaluated by two reviewers. The interrater agreement will be computed and discrepancies  
208 will be resolved by consensus or if necessary, by adjudication by a third independent  
209 reviewer.

210 The selection process will be illustrated by a flow-chart indicating the stages from unsorted search  
211 results to the total number of included studies. Study selection will be accomplished and organised  
212 using the Rayyan QCRI software (<https://rayyan.qcri.org/welcome>).

## 213 Data extraction and organisation

214 Data extraction will be done for all included papers by one reviewer. A randomly drawn proportion  
215 (5-10% depending on the total number of included papers) of these papers will also be assessed by a  
216 second reviewer to ensure adherence to the data extraction plan as well as assessment of the quality  
217 of the extraction. Data will be extracted according to the following details:

- 218 • Bibliographic information
  - 219 ○ Author information
  - 220 ○ Title

- 221 ○ Journal
- 222 ○ Year of publication
- 223 ○ Country of corresponding author
- 224 ● Information about study design
  - 225 ○ Quantitative or qualitative
  - 226 ○ Study design
  - 227 ○ Study setting
  - 228 ○ Participants
  - 229 ○ Gender distribution
- 230 ● Subject matter information
  - 231 ○ Main aim of study
  - 232 ○ Type of social media use
  - 233 ○ How social media use was assessed
  - 234 ○ Mental health or well-being measure
  - 235 ○ Report gender differences
  - 236 ○ Main finding/conclusion (free text)
  - 237 ○ Type of scales used (only applicable in quantitative studies)

238 Data extraction and synthesis will be accomplished and organised using an electronic data  
239 spreadsheet.

## 240 Data synthesis: Quantification and narrative approach

241 The extracted data will first be submitted to simple quantitative analysis using descriptive statistics  
242 (frequencies and measures of central tendencies) with purpose of providing an overview of the main  
243 characteristics of the included studies [12]. The data will also be narratively assessed with a focus on  
244 the core themes and concepts emerging from the extracted data. This thematic analysis will be  
245 performed by two reviewers independently, guided by three main axes:

- 246 1) **Mental health:** Which aspects of mental health were focussed in each study?
- 247 2) **Social media:** What type of social media use was the focus of the study? Typology will be  
248 based on Kaplan and Haenlein's [15] classification scheme.
- 249 3) **Type of study:** Was the study qualitative or quantitative?

250 The results will be compared and consolidated by consensus between the two reviewers. The  
251 resulting themes will be reviewed by a third independent reviewer to ensure validity and credibility.  
252 The themes will be reported to highlight the similarities, patterns and differences found in the  
253 literature, using a content-based approach. The reviewers are trained clinical psychologists educated  
254 based on the scientist-practitioner model. All but one of the researchers involved have experience  
255 with different kinds of reviews, such as narrative reviews and systematic reviews.

## 256 Presentation of the results

257 The purpose of scoping reviews is to aggregate and synthesise data in order to gain an overview of a  
258 field of research. Our results will be presented in tables and visual illustrations (e.g. graphs and  
259 figures) and according to the emerging themes from the analyses described above. The exact  
260 presentation format will be further specified as the review process develops [13]. The current  
261 scoping review will strive to adhere to the PRISMA-ScR (Preferred Reporting Items for Systematic  
262 reviews and Meta-analyses extension for Scoping Reviews) as presented by Tricco and colleagues  
263 [20].

## 264 Ethical considerations and dissemination of knowledge gained

265 This protocol is a transparent description of the planned methodology for a scoping review. Our  
266 aspiration is that this protocol will lay the groundwork for a comprehensive and rigorous review that  
267 can contribute to the advancement of research related to adolescents, social media, mental health  
268 and well-being. The review will contribute to the advancement of research on this subject by  
269 identifying central research themes and gaps in knowledge and research. The results will be  
270 disseminated through publications as well as presentations at relevant conferences. Furthermore,  
271 our results may inform new research and policy initiatives addressing the subject matter.

## 272 Acknowledgements

273 The authors would like to thank Bergen municipality, Hordaland County Council and Western Norway  
274 University of Applied Sciences for their collaboration and help with the review.

## 275 Funding

276 This review is partly funded by Regional Research Funds in Norway, funding #RFF297031. No other  
277 specific funding was received for the present project. The present project is associated with a larger  
278 innovation-project lead by Bergen municipality in Western Norway related to the use of social media  
279 and mental health and well-being. The innovation-project is funded by a programme initiated by the  
280 Norwegian Directorate of Health, and aims to explore social media as platform for health-promotion  
281 among adolescents.



1  
2  
3  
4 282 **Conflicts of interests**

5  
6 283 None.

7  
8  
9  
10 284 **Author statement**

11  
12 285 All authors, VS, LEA and JCS, have made substantive intellectual contributions to the development of  
13  
14 286 this protocol. JCS conceptualised the review approach, provided general guidance to the research  
15  
16 287 team, and drafted the first version. VS developed the draft further, and all authors were involved in  
17  
18 288 further revisions of the draft, review questions and the review design. All authors approve the final  
19  
20 289 version of the manuscript.

21  
22  
23 290 **Data statement**

24  
25 291 Data statement not applicable.  
26  
27  
28  
29  
30  
31  
32  
33  
34  
35  
36  
37  
38  
39  
40  
41  
42  
43  
44  
45  
46  
47  
48  
49  
50  
51  
52  
53  
54  
55  
56  
57  
58  
59  
60

## 292 References

- 293 1. eMarketer. *Number of social media users worldwide from 2010 to 2021 (in billions)*. 2017  
 294 [cited 2019 March 21]; Available from: [https://www.statista.com/statistics/278414/number-](https://www.statista.com/statistics/278414/number-of-worldwide-social-network-users/)  
 295 [of-worldwide-social-network-users/](https://www.statista.com/statistics/278414/number-of-worldwide-social-network-users/).
- 296 2. Ofcom, *Children and Parents: Media Use and Attitudes Report*. 2018.
- 297 3. DataReportal. *Most popular social networks worldwide as of January 2019, ranked by*  
 298 *number of active users (in millions)*. 2019 [cited 2019 March 21]; Available from:  
 299 [https://www.statista.com/statistics/272014/global-social-networks-ranked-by-number-of-](https://www.statista.com/statistics/272014/global-social-networks-ranked-by-number-of-users/)  
 300 [users/](https://www.statista.com/statistics/272014/global-social-networks-ranked-by-number-of-users/).
- 301 4. Han, B., *Social media burnout: Definition, measurement instrument, and why we care*. Journal  
 302 of Computer Information Systems, 2018. **58**(2): p. 122-130.
- 303 5. Duggan, M. and J. Brenner, *The demographics of social media users - 2012*. 2013,  
 304 Washington, DC: Pew Research Center's Internet & American Life Project.
- 305 6. Lin, L.Y., et al., *Association between social media use and depression among US young adults*.  
 306 *Depression and anxiety*, 2016. **33**(4): p. 323-331.
- 307 7. Best, P., R. Manktelow, and B. Taylor, *Online communication, social media and adolescent*  
 308 *wellbeing: A systematic narrative review*. Children and Youth Services Review, 2014. **41**: p.  
 309 27-36.
- 310 8. Twenge, J.M. and W.K. Campbell, *Media Use Is Linked to Lower Psychological Well-Being:*  
 311 *Evidence from Three Datasets*. Psychiatric Quarterly, 2019. **11**: p. 11.
- 312 9. Orben, A. and A.K. Przybylski, *The association between adolescent well-being and digital*  
 313 *technology use*. Nature Human Behaviour, 2019. **3**(2): p. 173.
- 314 10. Berryman, C., C.J. Ferguson, and C. Negy, *Social media use and mental health among young*  
 315 *adults*. Psychiatric quarterly, 2018. **89**(2): p. 307-314.
- 316 11. Mueller, M., *Challenging the Social Media Moral Panic: Preserving Free Expression under*  
 317 *Hypertransparency*. The CATO Papers on Public Policy, 2019.
- 318 12. Mays, N., E. Roberts, and J. Popay, *Synthesising research evidence*, in *Methods for studying*  
 319 *the delivery and organisation of health services*, N. Fulop, et al., Editors. 2001, Routledge:  
 320 London.
- 321 13. Arksey, H. and L. O'Malley, *Scoping studies: towards a methodological framework*.  
 322 *International journal of social research methodology*, 2005. **8**(1): p. 19-32.
- 323 14. International, C. *Age Restrictions on Social Media Services*. 2018 [cited 2019 30.09.19];  
 324 Available from: <https://www.childnet.com/blog/age-restrictions-on-social-media-services>.
- 325 15. Kaplan, A.M. and M. Haenlein, *Users of the world, unite! The challenges and opportunities of*  
 326 *Social Media*. Business horizons, 2010. **53**(1): p. 59-68.
- 327 16. Kietzmann, J.H., et al., *Social media? Get serious! Understanding the functional building*  
 328 *blocks of social media*. Business horizons, 2011. **54**(3): p. 241-251.
- 329 17. Sayers, A., *Tips and tricks in performing a systematic review*. British Journal of General  
 330 Practice, 2007. **57**(542): p. 759.
- 331 18. Laine, C. and M.A. Winker, *Identifying predatory or pseudo-journals*. Biochemia medica,  
 332 2017. **27**(2): p. 285-291.
- 333 19. Levac, D., H. Colquhoun, and K.K. O'Brien, *Scoping studies: advancing the methodology*.  
 334 *Implementation science*, 2010. **5**(1): p. 69.
- 335 20. Tricco, A.C., et al., *PRISMA extension for scoping reviews (PRISMA-ScR): checklist and*  
 336 *explanation*. Annals of internal medicine, 2018. **169**(7): p. 467-473.

## Preferred Reporting Items for Systematic reviews and Meta-Analyses extension for Scoping Reviews (PRISMA-ScR) Checklist

| SECTION                           | ITEM | PRISMA-ScR CHECKLIST ITEM                                                                                                                                                                                                                                                                                  | REPORTED ON PAGE #       |
|-----------------------------------|------|------------------------------------------------------------------------------------------------------------------------------------------------------------------------------------------------------------------------------------------------------------------------------------------------------------|--------------------------|
| <b>TITLE</b>                      |      |                                                                                                                                                                                                                                                                                                            |                          |
| Title                             | 1    | Identify the report as a scoping review.                                                                                                                                                                                                                                                                   | Page 1<br>Line 5         |
| <b>ABSTRACT</b>                   |      |                                                                                                                                                                                                                                                                                                            |                          |
| Structured summary                | 2    | Provide a structured summary that includes (as applicable): background, objectives, eligibility criteria, sources of evidence, charting methods, results, and conclusions that relate to the review questions and objectives.                                                                              | Page 2<br>Lines 25-46    |
| <b>INTRODUCTION</b>               |      |                                                                                                                                                                                                                                                                                                            |                          |
| Rationale                         | 3    | Describe the rationale for the review in the context of what is already known. Explain why the review questions/objectives lend themselves to a scoping review approach.                                                                                                                                   | Page 4<br>Lines 29-30    |
| Objectives                        | 4    | Provide an explicit statement of the questions and objectives being addressed with reference to their key elements (e.g., population or participants, concepts, and context) or other relevant key elements used to conceptualize the review questions and/or objectives.                                  | Page 5<br>Lines 117-121  |
| <b>METHODS</b>                    |      |                                                                                                                                                                                                                                                                                                            |                          |
| Protocol and registration         | 5    | Indicate whether a review protocol exists; state if and where it can be accessed (e.g., a Web address); and if available, provide registration information, including the registration number.                                                                                                             | This is a protocol       |
| Eligibility criteria              | 6    | Specify characteristics of the sources of evidence used as eligibility criteria (e.g., years considered, language, and publication status), and provide a rationale.                                                                                                                                       | Page 6-8, lines 149-195  |
| Information sources*              | 7    | Describe all information sources in the search (e.g., databases with dates of coverage and contact with authors to identify additional sources), as well as the date the most recent search was executed.                                                                                                  | Page 6-7, lines 149-162  |
| Search                            | 8    | Present the full electronic search strategy for at least 1 database, including any limits used, such that it could be repeated.                                                                                                                                                                            | SEE ATTACHMENT           |
| Selection of sources of evidence† | 9    | State the process for selecting sources of evidence (i.e., screening and eligibility) included in the scoping review.                                                                                                                                                                                      | Page 7-8<br>Line 163-195 |
| Data charting process‡            | 10   | Describe the methods of charting data from the included sources of evidence (e.g., calibrated forms or forms that have been tested by the team before their use, and whether data charting was done independently or in duplicate) and any processes for obtaining and confirming data from investigators. | Page 8-9<br>Line 196-245 |
| Data items                        | 11   | List and define all variables for which data were sought and any assumptions and simplifications made.                                                                                                                                                                                                     | Page 8-9<br>Line 213-236 |
| Critical appraisal of individual  | 12   | If done, provide a rationale for conducting a critical appraisal of included sources of evidence; describe                                                                                                                                                                                                 | Page 8<br>Line 213-216   |

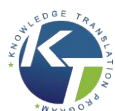

| SECTION                                       | ITEM | PRISMA-ScR CHECKLIST ITEM                                                                                                                                                                       | REPORTED ON PAGE #                 |
|-----------------------------------------------|------|-------------------------------------------------------------------------------------------------------------------------------------------------------------------------------------------------|------------------------------------|
| sources of evidence§                          |      | the methods used and how this information was used in any data synthesis (if appropriate).                                                                                                      |                                    |
| Synthesis of results                          | 13   | Describe the methods of handling and summarizing the data that were charted.                                                                                                                    | Page 9<br>Line 240-244             |
| <b>RESULTS</b>                                |      |                                                                                                                                                                                                 |                                    |
| Selection of sources of evidence              | 14   | Give numbers of sources of evidence screened, assessed for eligibility, and included in the review, with reasons for exclusions at each stage, ideally using a flow diagram.                    | Page 6<br>Line 149-152             |
| Characteristics of sources of evidence        | 15   | For each source of evidence, present characteristics for which data were charted and provide the citations.                                                                                     | Not applicable, this is a protocol |
| Critical appraisal within sources of evidence | 16   | If done, present data on critical appraisal of included sources of evidence (see item 12).                                                                                                      | Not applicable, this is a protocol |
| Results of individual sources of evidence     | 17   | For each included source of evidence, present the relevant data that were charted that relate to the review questions and objectives.                                                           | Not applicable, this is a protocol |
| Synthesis of results                          | 18   | Summarize and/or present the charting results as they relate to the review questions and objectives.                                                                                            | Not applicable, this is a protocol |
| <b>DISCUSSION</b>                             |      |                                                                                                                                                                                                 |                                    |
| Summary of evidence                           | 19   | Summarize the main results (including an overview of concepts, themes, and types of evidence available), link to the review questions and objectives, and consider the relevance to key groups. | Not applicable, this is a protocol |
| Limitations                                   | 20   | Discuss the limitations of the scoping review process.                                                                                                                                          | Not applicable, this is a protocol |
| Conclusions                                   | 21   | Provide a general interpretation of the results with respect to the review questions and objectives, as well as potential implications and/or next steps.                                       | Not applicable, this is a protocol |
| <b>FUNDING</b>                                |      |                                                                                                                                                                                                 |                                    |
| Funding                                       | 22   | Describe sources of funding for the included sources of evidence, as well as sources of funding for the scoping review. Describe the role of the funders of the scoping review.                 | Page 10<br>Line 275-280            |

JBI = Joanna Briggs Institute; PRISMA-ScR = Preferred Reporting Items for Systematic reviews and Meta-Analyses extension for Scoping Reviews.

\* Where *sources of evidence* (see second footnote) are compiled from, such as bibliographic databases, social media platforms, and Web sites.

† A more inclusive/heterogeneous term used to account for the different types of evidence or data sources (e.g., quantitative and/or qualitative research, expert opinion, and policy documents) that may be eligible in a scoping review as opposed to only studies. This is not to be confused with *information sources* (see first footnote).

‡ The frameworks by Arksey and O'Malley (6) and Levac and colleagues (7) and the JBI guidance (4, 5) refer to the process of data extraction in a scoping review as data charting.

§ The process of systematically examining research evidence to assess its validity, results, and relevance before using it to inform a decision. This term is used for items 12 and 19 instead of "risk of bias" (which is more applicable to systematic reviews of interventions) to include and acknowledge the various sources of evidence that may be used in a scoping review (e.g., quantitative and/or qualitative research, expert opinion, and policy document).

From: Tricco AC, Lillie E, Zarin W, O'Brien KK, Colquhoun H, Levac D, et al. PRISMA Extension for Scoping Reviews (PRISMA-ScR): Checklist and Explanation. *Ann Intern Med.* 2018;169:467–473. doi: 10.7326/M18-0850.

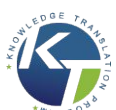

St. Michael's

Inspired Care.  
Inspiring Science.

For peer review only - <http://bmjopen.bmj.com/site/about/guidelines.xhtml>

# BMJ Open

**Central themes, core concepts and knowledge gaps concerning social media use, and mental health and well-being among adolescents. A protocol of a scoping review of published literature.**

|                                 |                                                                                                                                                                                                                     |
|---------------------------------|---------------------------------------------------------------------------------------------------------------------------------------------------------------------------------------------------------------------|
| Journal:                        | <i>BMJ Open</i>                                                                                                                                                                                                     |
| Manuscript ID                   | bmjopen-2019-031105.R2                                                                                                                                                                                              |
| Article Type:                   | Protocol                                                                                                                                                                                                            |
| Date Submitted by the Author:   | 21-Dec-2019                                                                                                                                                                                                         |
| Complete List of Authors:       | Schønning, Viktor; Norwegian Institute of Public Health, Department of Health Promotion<br>Aarø, Leif; Norwegian Institute of Public Health, Division of Mental Health Skogen, Jens; Nasjonalt folkehelseinstitutt, |
| <b>Primary Subject Heading</b>: | Public health                                                                                                                                                                                                       |
| Secondary Subject Heading:      | Public health, Health policy                                                                                                                                                                                        |
| Keywords:                       | MENTAL HEALTH, Child & adolescent psychiatry < PSYCHIATRY, Anxiety disorders < PSYCHIATRY, Depression & mood disorders < PSYCHIATRY                                                                                 |
|                                 |                                                                                                                                                                                                                     |

SCHOLARONE™  
Manuscripts

1  
2  
3  
4  
5 1 Central themes, core concepts and  
6  
7  
8  
9 2 knowledge gaps concerning social  
10  
11  
12  
13 3 media use, and mental health and  
14  
15  
16  
17 4 well-being among adolescents. A  
18  
19  
20  
21 5 protocol of a scoping review of  
22  
23  
24  
25 6 published literature.  
26

27 7 Authors: Viktor Schønning<sup>1</sup>, Leif Edvard Aarø<sup>1</sup> & Jens Christoffer Skogen<sup>1,2,3</sup>  
28  
29 8  
30  
31 9  
32

33 10 <sup>1</sup>Department of Health Promotion, Norwegian Institute of Public Health, Bergen, Norway

34 11 <sup>2</sup>Alcohol and Drug Research Western Norway (KoRFor), Stavanger University Hospital, Stavanger,  
35 12 Norway

36 13 <sup>3</sup>Faculty of Health Sciences, University of Stavanger, Stavanger, Norway  
37 14  
38  
39  
40 15

41 16 Corresponding author: Viktor Schønning

42 17 Postal address: Norwegian Institute of Public Health,  
43 18 Zander Kaaes gate 7, 5015 Bergen

44 19 E-mail: [Viktor.schonning@fhi.no](mailto:Viktor.schonning@fhi.no)  
45 20  
46  
47  
48  
49  
50 21

51 22 Word count: 2496

52 23 Abstract word count: 294  
53 24  
54  
55  
56  
57  
58  
59  
60

## 25 Abstract

26 **Introduction:** The use of social media has risen steadily since its introduction in the early 2000s, and  
27 today there are between two and three billion users worldwide. Research on the link between use of  
28 social media and mental health has resulted in a vast number of studies covering diverse aspects of  
29 the link between them. The existing body of knowledge on use of social media, and mental health  
30 and well-being among adolescents is complex and difficult-to-follow. In this paper we present a  
31 protocol for a scoping review to systematically identify and summarize the central research foci and  
32 knowledge gaps in the research field of social media use, and mental health and well-being among  
33 adolescents.

34 **Methods and analysis:** The current scoping review will adhere to the PRISMA-ScR (Preferred  
35 Reporting Items for Systematic reviews and Meta-Analyses extension for Scoping Reviews). The first  
36 step is to search relevant databases for eligible studies. Relevant databases are CINAHL, Ovid  
37 Medline, Embase, PsycINFO, Sociological Abstracts, Sociological Services Abstracts, ERIC, Cochrane  
38 Database of Systematic Reviews, CRD (Database of Abstracts of Reviews of Effects), NHS EED, HTA  
39 and Epistemonikos. Next, two reviewers from the research team will independently screen the  
40 identified studies for eligibility. Data extraction and data synthesis will be performed and result in  
41 summarized themes based on the findings.

42 **Ethics and dissemination:** A scoping review can be described as a method of gaining an overview and  
43 understanding of a research area, with its strengths and weaknesses, and as it involves peer-  
44 reviewed and published articles, a scoping review does not require ethical approval. We expect that  
45 the results from the current scoping review will produce a consolidated overview of existing studies  
46 and research gaps, and gather this knowledge into a coherent review. The results will be  
47 disseminated through relevant journals and conferences.

48

49 **Keywords:** scoping review; social media; mental health; adolescence; well-being

50

## 51 Article summary

### 52 Strengths and limitations of this study:

- 53 • A strength of the current study is that it will be one of the first scoping review to  
54 systematically identify and summarize the central research foci and knowledge gaps in the  
55 research field of social media use, and mental health and well-being among adolescents (13-  
56 19 years) in both qualitative and quantitative studies.
- 57 • Another strength is that the search strategy includes several electronic databases with  
58 published peer-reviewed literature, with an aim to cover all relevant research publications.
- 59 • Initial selection of articles will be done by two reviewers independently which is considered a  
60 strength of the study.
- 61 • It is considered a strength that data extraction from included articles will be done by two  
62 reviewers independently to ensure the quality of the collected information.
- 63 • Being a scoping review, no formal assessment of study quality will be carried out. This is  
64 considered a limitation of the current study.

65



## 66 Background

67 Social media is a relatively new phenomenon with an increasing popularity. The number of social  
68 media users worldwide has increased rapidly the last years, reaching 2 billion in 2015 and is  
69 estimated to reach 3 billion users in 2021 [1]. Among youth aged 12-15 years in the UK, 99 % go  
70 online for at least 20 hours a week and 69 % gave a social media profile according to an rapport on  
71 media use [2]. Today, social media use is ubiquitous in adolescents worldwide regardless of  
72 differences such as culture, geographic region or socioeconomic status. Social media include services  
73 such as Facebook, Twitter, Snapchat and Instagram, with Facebook being the largest social media  
74 based on the number of users, followed by YouTube and WhatsApp [3, 4]. Young adults are more  
75 likely than older adults to use social media, with the demographic of users varying slightly between  
76 type of media [5]. The effects of increased social media use on youth health are still largely unknown,  
77 though some studies indicate detrimental effects on mental health [4]. A US survey from 2016 found  
78 a significant association between social media use and increased depression, but the mechanisms  
79 and direction of the association were not identified [6]. A systematic narrative review reports  
80 contradictory findings with both beneficial and harmful effects of social media use [7]. There is  
81 currently an ongoing debate regarding the strength of the association between adolescent well-being  
82 and the use of digital technology and social media with Twenge and colleagues being adamant about  
83 its negative impact [8]. On the other side, Przybylski and colleagues have found that the association  
84 between digital technology use and adolescent well-being is negative but only explaining 0.4 % of the  
85 variation in well-being, and they suggest that these effects are too small to warrant any policy  
86 change [9]. The possibility that concerns regarding social media use may be exaggerated is also  
87 suggested by Berryman and colleagues in their study from 2018 [10]. There is also the possibility that  
88 the issue of moral panic is contributing to misrepresenting the detrimental effects of social media  
89 use on adolescents well-being. Moral panic can be defined as an exaggerated concern about a  
90 supposed threat to the current culture, way of life or society's current structure. Moral panic is a  
91 phenomenon which has been heavily discussed regarding the effects of introducing new media  
92 technologies such as video games, TV and radio [11]. It is, however, difficult to pinpoint if moral panic  
93 exists and what role it plays in presenting the evidence of social media use on well-being. Given the  
94 research interest in the link between adolescents' social media use, and mental health and well-  
95 being, the planned scoping review will establish an overview over the existing body of knowledge  
96 and contribute to advance this field of research. Given the recency of the phenomenon, it is vital to  
97 identify and describe core themes as well as knowledge gaps when it comes to the effect of social  
98 media use on adolescent's mental health and well-being. The realm of social media is complex and  
99 multi-layered with several stakeholders and a constantly changing technological landscape. The

1  
2  
3 100 content of social media is both user-generated and commercially generated and there are often both  
4  
5 101 corporate and public interests and stake-holders in the phenomenon. A scoping review would help  
6  
7 102 provide a foundation for further research, which in time will provide a knowledge base for  
8  
9 103 policymaking and service delivery.

10 104 The purpose of scoping reviews can be described as a way of mapping “the key concepts  
11  
12 105 underpinning a research area, and the main sources and types of evidence available, and can be  
13  
14 106 undertaken as standalone projects in their own right, especially where an area is complex or has not  
15  
16 107 been reviewed comprehensively before” [12]. In our context, a scoping review will help provide an  
17  
18 108 understanding of the “big picture” and the main foci of research within the field of social media and  
19  
20 109 mental health and well-being among adolescents, as well as the data sources and research  
21  
22 110 instruments typically used. By utilizing the scoping review approach, the current study aims to  
23  
24 111 produce a consolidated overview of studies with diverging methodological designs and gather this  
25  
26 112 knowledge into a coherent review. Furthermore, one of the most frequent reasons for conducting a  
27  
28 113 scoping review is to identify gaps in the research literature [13]. A vast number of studies on social  
29  
30 114 media use and mental health has been conducted over the last decade, but to the authors’  
31  
32 115 knowledge no scoping review has yet been carried out.

33 116 The review described here will follow the framework put forward by Arksey and O’Malley, which can  
34  
35 117 be described according to five steps: 1) identifying the research question, 2) identifying relevant  
36  
37 118 studies, 3) selecting studies, 4) charting the data, and 5) collating, summarising and reporting the  
38  
39 119 results [13].

## 40 120 Aims

41  
42 121 This scoping review aims to give an overview of the main research questions that have been focused  
43  
44 122 on in relation to use of social media among adolescents and mental health and well-being. Both  
45  
46 123 quantitative and qualitative studies are of interest. Three specific secondary research questions will  
47  
48 124 be addressed and together with the main research question serve as a template for organizing the  
49  
50 125 results:

- 51 126 • Which aspects of mental health and well-being have been the focus or foci of research so  
52  
53 127 far?
- 54  
55 128 • Has the research focused on different research aims across gender, ethnicity, socio-economic  
56  
57 129 status, geographic location? What kind of findings are reported across these groups?
- 58  
59 130 • What are the main sources of evidence related to social media that have been used in the  
60  
61 131 studies identified?

## 132 Defining adolescence and social media

133 In the present review, adolescence is defined as those between 13 and 19 years of age. We chose the  
 134 age of 13 as our lower limit as nearly all social media services require users to be at least 13 years of  
 135 age to access and use their services [14]. This includes Facebook, Snapchat, Twitter, Instagram and  
 136 Skype [14]. All pertinent studies which present results relevant for this age range is within the scope  
 137 of this review. Social media is a broad term that is difficult to pin down. We have chosen to use the  
 138 following definition offered by Kietzmann and colleagues (2011, page 1): “Social media employ  
 139 mobile and web-based technologies to create highly interactive platforms via which individuals and  
 140 communities share, co-create, discuss, and modify user-generated content” [15]. This definition can  
 141 be applied to Kaplan and Haenlein’s [16] classification scheme that specify types of social media  
 142 across two axes – *social presence/media richness* and *self-presentation/self-disclosure* (see table 1).  
 143

|                                           |      | Social presence/media richness          |                                               |                                                            |
|-------------------------------------------|------|-----------------------------------------|-----------------------------------------------|------------------------------------------------------------|
|                                           |      | Lower                                   | Medium                                        | Higher                                                     |
| Self-<br>presentation/Self-<br>disclosure | High | Blogs                                   | Vlogs/Social networking sites (e.g. Facebook) | Virtual social worlds (e.g. Second Life, )                 |
|                                           | Low  | Collaborative projects (e.g. Wikipedia) | Content communities (e.g. Twitch, YouTube)    | Virtual game worlds (e.g. League of Legends, Apex Legends) |

144 **Table 1: Characteristics of social media across the axes social presence/media richness and self-**  
 145 **presentation/self-disclosure. Adapted from Kaplan and Haenlein [16].**

146 The chosen definition of social media excludes other use of electronic or web-based media or  
 147 programs, such as medical or health-related services (e.g. monitoring devices or medical reference),  
 148 one-way transmissions of content (e.g. podcasts) and real-time exchanges via technology (e.g.  
 149 Skype). We also exclude joint projects involving via technology (e.g. Microsoft Whiteboard). Online  
 150 discussion forums and bulletin boards will however be included, as the content is at least partly  
 151 generated by the users.

## 152 Data sources and search strategy

153 The following data sources were chosen due to their scope that include social sciences and public  
 154 health research: CINAHL, Ovid Medline, Embase, PsycINFO, Sociological Abstracts, Sociological

1  
2  
3 155 Services Abstracts, ERIC, Cochrane Database of Systematic Reviews, CRD (Database of Abstracts of  
4 156 Reviews of Effects), NHS EED, HTA and Epistemonikos. The search terms included combinations of  
5 157 different variants of 'adolescent', 'mental health', 'well-being' and 'social media', and only studies  
6 158 published the last five years were eligible. This limited search period was chosen mainly due to rapid  
7 159 changes in the use and types of use of social media. Findings more than five years old were therefore  
8 160 deemed to be less relevant to shed light on our research questions. There were also practical reasons  
9 161 to limiting our search to 2014, related to available resources. Before starting the full search, the  
10 162 search strategy was piloted in order to assess relevance. The start-date for the search was April 2019,  
11 163 with additional searches in May 2019. The snowballing technique will be used to identify articles that  
12 164 are not covered by our search, but only for studies published after 2014 [17]. Publisher and journals  
13 165 will be assessed for legitimacy according to the relevant criteria described by the Directory of Open  
14 166 Access Journals (DOAJ; for open access publications) and other relevant sources [18].

## 167 Study selection: Exclusion and inclusion criteria

### 168 Inclusion

- 169 • Published in English.
- 170 • Peer-reviewed papers
- 171 • Published within the last 5 years (since 2014)
- 172 • Participants/Informants aged between 13-19 years
- 173 • Empirical studies of primary research
- 174 • Observational or participatory studies
- 175 • Systematic reviews (and meta-analyses)
- 176 • Explicit focus on mental health, sleep and/or well-being
- 177 • Explicit focus on social media

### 178 Exclusion

- 179 • Editorials, opinion pieces, commentaries
- 180 • Study or review protocols
- 181 • Book chapters
- 182 • Publications not peer-reviewed
- 183 • Non-empirical studies
- 184 • Theoretical studies, perspective articles
- 185 • Specific (sub-)populations such as individuals with chronic illness or physical or mental  
186 disabilities
- 187 • Specific sub-populations, minority groups
- 188 • Intervention studies
- 189 • Treatment studies

- 190 • Internet- or app-based therapy
- 191 • Unpublished studies/conference proceedings
- 192 • Not within our definition of social media
- 193 • Studies where social media is only used as a moderator
- 194 • Studies which focus on internet gambling
- 195 • Clinical studies or clinical case-reports
- 196 • Studies focusing on the use of online information
- 197 • Studies focusing on aggression and violence (beyond cyber bullying)
- 198 • Studies focusing on brain disorders/cognitive disorders
- 199 • Studies focusing on information processing, decision-making or personality

200 The initial criteria used for study selection are part of an iterative process [19], and we will follow a  
 201 two-stage approach:

- 202 1) Learning and adjusting stage: Two reviewers will independently screen titles and abstracts of  
 203 300 randomly drawn studies for eligibility. The purpose of this stage is to clarify the initial  
 204 inclusion criteria, and to identify any uncertainties related to the inclusion and exclusion of  
 205 papers. A third independent reviewer can be consulted if necessary. Adjustments will be  
 206 made if deemed necessary.
- 207 2) Final selection stage: Two reviewers will independently screen titles and abstracts of all  
 208 studies for eligibility according to the revised and updated inclusion and exclusion criteria.  
 209 The full text of studies assessed as 'relevant' or 'unclear' will then be independently  
 210 evaluated by two reviewers. The interrater agreement will be computed and discrepancies  
 211 will be resolved by consensus or if necessary, by adjudication by a third independent  
 212 reviewer.

213 The selection process will be illustrated by a flow-chart indicating the stages from unsorted search  
 214 results to the total number of included studies. Study selection will be accomplished and organised  
 215 using the Rayyan QCRI software (<https://rayyan.qcri.org/welcome>). Both reviewers are trained  
 216 clinical psychologists based on the scientist-practitioner model.

## 217 Data extraction and organisation

218 Data extraction will be done for all included papers by one reviewer. A randomly drawn proportion  
 219 (5-10% depending on the total number of included papers) of these papers will also be assessed by a  
 220 second reviewer to ensure adherence to the data extraction plan as well as assessment of the quality  
 221 of the extraction. Data will be extracted according to the following details:

- 222 • Bibliographic information
  - 223 ○ Author information

- 1  
2  
3 224           ○ Title  
4 225           ○ Journal  
5 226           ○ Year of publication  
6 227           ○ Country of corresponding author  
7  
8 228       • Information about study design  
9           ○ Quantitative or qualitative  
10 229           ○ Study design  
11 230           ○ Study setting  
12 231           ○ Participants  
13 232           ○ Gender distribution  
14 233  
15 234       • Subject matter information  
16           ○ Main aim of study  
17 235           ○ Type of social media use  
18 236           ○ How social media use was assessed  
19 237           ○ Mental health or well-being measure  
20 238           ○ Report gender differences  
21 239           ○ Main finding/conclusion (free text)  
22 240           ○ Type of scales used (only applicable in quantitative studies)  
23 241

24 242 Data extraction and synthesis will be accomplished and organised using an electronic data  
25 243 spreadsheet.

## 244 Data synthesis: Quantification and narrative approach

245 The extracted data will first be submitted to simple quantitative analysis using descriptive statistics  
246 (frequencies and measures of central tendencies) with purpose of providing an overview of the main  
247 characteristics of the included studies [12]. The data will also be narratively assessed with a focus on  
248 the core themes and concepts emerging from the extracted data. This thematic analysis will be  
249 performed by two reviewers independently, guided by three main axes:

- 250       1) **Mental health:** Which aspects of mental health were focussed in each study?  
251       2) **Social media:** What type of social media use was the focus of the study? Typology will be  
252           based on Kaplan and Haenlein's [16] classification scheme.  
253       3) **Type of study:** Was the study qualitative or quantitative?

254 The results will be compared and consolidated by consensus between the two reviewers. The  
255 resulting themes will be reviewed by a third independent reviewer to ensure validity and credibility.  
256 The themes will be reported to highlight the similarities, patterns and differences found in the  
257 literature, using a content-based approach. The reviewers are trained clinical psychologists educated  
258 based on the scientist-practitioner model. All but one of the researchers involved have experience  
259 with different kinds of reviews, such as narrative reviews and systematic reviews.

## 260 Public and Patient Involvement

261 No patient involved.

## 262 Presentation of the results

263 The purpose of scoping reviews is to aggregate and synthesise data in order to gain an overview of a  
264 field of research. Our results will be presented in tables and visual illustrations (e.g. graphs and  
265 figures) and according to the emerging themes from the analyses described above. The exact  
266 presentation format will be further specified as the review process develops [13]. The current  
267 scoping review will strive to adhere to the PRISMA-ScR (Preferred Reporting Items for Systematic  
268 reviews and Meta-analyses extension for Scoping Reviews) as presented by Tricco and colleagues  
269 [20].

## 270 Ethical considerations and dissemination of knowledge gained

271 This protocol is a transparent description of the planned methodology for a scoping review. Our  
272 aspiration is that this protocol will lay the groundwork for a comprehensive and rigorous review that  
273 can contribute to the advancement of research related to adolescents, social media, mental health  
274 and well-being. The review will contribute to the advancement of research on this subject by  
275 identifying central research themes and gaps in knowledge and research. The results will be  
276 disseminated through publications as well as presentations at relevant conferences. Furthermore,  
277 our results may inform new research and policy initiatives addressing the subject matter.

## 278 Acknowledgements

279 The authors would like to thank Bergen municipality, Hordaland County Council and Western Norway  
280 University of Applied Sciences for their collaboration and help with the review.

## 281 Funding

282 This review is partly funded by Regional Research Funds in Norway, funding #RFF297031. No other  
283 specific funding was received for the present project. The present project is associated with a larger  
284 innovation-project lead by Bergen municipality in Western Norway related to the use of social media  
285 and mental health and well-being. The innovation-project is funded by a programme initiated by the  
286 Norwegian Directorate of Health, and aims to explore social media as platform for health-promotion  
287 among adolescents.

1  
2  
3  
4 288 **Conflicts of interests**

5  
6 289 None.

7  
8  
9  
10 290 **Author statement**

11  
12 291 All authors, VS, LEA and JCS, have made substantive intellectual contributions to the development of  
13 292 this protocol. JCS conceptualised the review approach, provided general guidance to the research  
14 293 team, and drafted the first version. VS developed the draft further, and all authors were involved in  
15 294 further revisions of the draft, review questions and the review design. All authors approve the final  
16 295 version of the manuscript.

17  
18  
19  
20  
21  
22 296 **Data statement**

23  
24  
25 297 Data statement not applicable.  
26  
27  
28  
29  
30  
31  
32  
33  
34  
35  
36  
37  
38  
39  
40  
41  
42  
43  
44  
45  
46  
47  
48  
49  
50  
51  
52  
53  
54  
55  
56  
57  
58  
59  
60



## 298 References

- 299 1. eMarketer. *Number of social media users worldwide from 2010 to 2021 (in billions)*. 2017  
300 [cited 2019 March 21]; Available from: [https://www.statista.com/statistics/278414/number-](https://www.statista.com/statistics/278414/number-of-worldwide-social-network-users/)  
301 [of-worldwide-social-network-users/](https://www.statista.com/statistics/278414/number-of-worldwide-social-network-users/).
- 302 2. Ofcom, *Children and Parents: Media Use and Attitudes Report*. 2018.
- 303 3. DataReportal. *Most popular social networks worldwide as of January 2019, ranked by*  
304 *number of active users (in millions)*. 2019 [cited 2019 March 21]; Available from:  
305 [https://www.statista.com/statistics/272014/global-social-networks-ranked-by-number-of-](https://www.statista.com/statistics/272014/global-social-networks-ranked-by-number-of-users/)  
306 [users/](https://www.statista.com/statistics/272014/global-social-networks-ranked-by-number-of-users/).
- 307 4. Han, B., *Social media burnout: Definition, measurement instrument, and why we care*. Journal  
308 of Computer Information Systems, 2018. **58**(2): p. 122-130.
- 309 5. Duggan, M. and J. Brenner, *The demographics of social media users - 2012*. 2013,  
310 Washington, DC: Pew Research Center's Internet & American Life Project.
- 311 6. Lin, L.Y., et al., *Association between social media use and depression among US young adults*.  
312 *Depression and anxiety*, 2016. **33**(4): p. 323-331.
- 313 7. Best, P., R. Manktelow, and B. Taylor, *Online communication, social media and adolescent*  
314 *wellbeing: A systematic narrative review*. Children and Youth Services Review, 2014. **41**: p.  
315 27-36.
- 316 8. Twenge, J.M. and W.K. Campbell, *Media Use Is Linked to Lower Psychological Well-Being:*  
317 *Evidence from Three Datasets*. Psychiatric Quarterly, 2019. **11**: p. 11.
- 318 9. Orben, A. and A.K. Przybylski, *The association between adolescent well-being and digital*  
319 *technology use*. Nature Human Behaviour, 2019. **3**(2): p. 173.
- 320 10. Berryman, C., C.J. Ferguson, and C. Negy, *Social media use and mental health among young*  
321 *adults*. Psychiatric quarterly, 2018. **89**(2): p. 307-314.
- 322 11. Mueller, M., *Challenging the Social Media Moral Panic: Preserving Free Expression under*  
323 *Hypertransparency*. The CATO Papers on Public Policy, 2019.
- 324 12. Mays, N., E. Roberts, and J. Popay, *Synthesising research evidence*, in *Methods for studying*  
325 *the delivery and organisation of health services*, N. Fulop, et al., Editors. 2001, Routledge:  
326 London.
- 327 13. Arksey, H. and L. O'Malley, *Scoping studies: towards a methodological framework*.  
328 *International journal of social research methodology*, 2005. **8**(1): p. 19-32.
- 329 14. International, C. *Age Restrictions on Social Media Services*. 2018 [cited 2019 30.09.19];  
330 Available from: <https://www.childnet.com/blog/age-restrictions-on-social-media-services>.
- 331 15. Kietzmann, J.H., et al., *Social media? Get serious! Understanding the functional building*  
332 *blocks of social media*. Business horizons, 2011. **54**(3): p. 241-251.
- 333 16. Kaplan, A.M. and M. Haenlein, *Users of the world, unite! The challenges and opportunities of*  
334 *Social Media*. Business horizons, 2010. **53**(1): p. 59-68.
- 335 17. Sayers, A., *Tips and tricks in performing a systematic review*. British Journal of General  
336 Practice, 2007. **57**(542): p. 759.
- 337 18. Laine, C. and M.A. Winker, *Identifying predatory or pseudo-journals*. Biochemia medica,  
338 2017. **27**(2): p. 285-291.
- 339 19. Levac, D., H. Colquhoun, and K.K. O'Brien, *Scoping studies: advancing the methodology*.  
340 *Implementation science*, 2010. **5**(1): p. 69.
- 341 20. Tricco, A.C., et al., *PRISMA extension for scoping reviews (PRISMA-ScR): checklist and*  
342 *explanation*. Annals of internal medicine, 2018. **169**(7): p. 467-473.

## Preferred Reporting Items for Systematic reviews and Meta-Analyses extension for Scoping Reviews (PRISMA-ScR) Checklist

| SECTION                           | ITEM | PRISMA-ScR CHECKLIST ITEM                                                                                                                                                                                                                                                                                  | REPORTED ON PAGE #       |
|-----------------------------------|------|------------------------------------------------------------------------------------------------------------------------------------------------------------------------------------------------------------------------------------------------------------------------------------------------------------|--------------------------|
| <b>TITLE</b>                      |      |                                                                                                                                                                                                                                                                                                            |                          |
| Title                             | 1    | Identify the report as a scoping review.                                                                                                                                                                                                                                                                   | Page 1<br>Line 5         |
| <b>ABSTRACT</b>                   |      |                                                                                                                                                                                                                                                                                                            |                          |
| Structured summary                | 2    | Provide a structured summary that includes (as applicable): background, objectives, eligibility criteria, sources of evidence, charting methods, results, and conclusions that relate to the review questions and objectives.                                                                              | Page 2<br>Lines 25-46    |
| <b>INTRODUCTION</b>               |      |                                                                                                                                                                                                                                                                                                            |                          |
| Rationale                         | 3    | Describe the rationale for the review in the context of what is already known. Explain why the review questions/objectives lend themselves to a scoping review approach.                                                                                                                                   | Page 4<br>Lines 29-30    |
| Objectives                        | 4    | Provide an explicit statement of the questions and objectives being addressed with reference to their key elements (e.g., population or participants, concepts, and context) or other relevant key elements used to conceptualize the review questions and/or objectives.                                  | Page 5<br>Lines 117-121  |
| <b>METHODS</b>                    |      |                                                                                                                                                                                                                                                                                                            |                          |
| Protocol and registration         | 5    | Indicate whether a review protocol exists; state if and where it can be accessed (e.g., a Web address); and if available, provide registration information, including the registration number.                                                                                                             | This is a protocol       |
| Eligibility criteria              | 6    | Specify characteristics of the sources of evidence used as eligibility criteria (e.g., years considered, language, and publication status), and provide a rationale.                                                                                                                                       | Page 6-8, lines 149-195  |
| Information sources*              | 7    | Describe all information sources in the search (e.g., databases with dates of coverage and contact with authors to identify additional sources), as well as the date the most recent search was executed.                                                                                                  | Page 6-7, lines 149-162  |
| Search                            | 8    | Present the full electronic search strategy for at least 1 database, including any limits used, such that it could be repeated.                                                                                                                                                                            | SEE ATTACHMENT           |
| Selection of sources of evidence† | 9    | State the process for selecting sources of evidence (i.e., screening and eligibility) included in the scoping review.                                                                                                                                                                                      | Page 7-8<br>Line 163-195 |
| Data charting process‡            | 10   | Describe the methods of charting data from the included sources of evidence (e.g., calibrated forms or forms that have been tested by the team before their use, and whether data charting was done independently or in duplicate) and any processes for obtaining and confirming data from investigators. | Page 8-9<br>Line 196-245 |
| Data items                        | 11   | List and define all variables for which data were sought and any assumptions and simplifications made.                                                                                                                                                                                                     | Page 8-9<br>Line 213-236 |
| Critical appraisal of individual  | 12   | If done, provide a rationale for conducting a critical appraisal of included sources of evidence; describe                                                                                                                                                                                                 | Page 8<br>Line 213-216   |

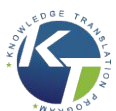

| SECTION                                       | ITEM | PRISMA-ScR CHECKLIST ITEM                                                                                                                                                                       | REPORTED ON PAGE #                 |
|-----------------------------------------------|------|-------------------------------------------------------------------------------------------------------------------------------------------------------------------------------------------------|------------------------------------|
| sources of evidence§                          |      | the methods used and how this information was used in any data synthesis (if appropriate).                                                                                                      |                                    |
| Synthesis of results                          | 13   | Describe the methods of handling and summarizing the data that were charted.                                                                                                                    | Page 9<br>Line 240-244             |
| <b>RESULTS</b>                                |      |                                                                                                                                                                                                 |                                    |
| Selection of sources of evidence              | 14   | Give numbers of sources of evidence screened, assessed for eligibility, and included in the review, with reasons for exclusions at each stage, ideally using a flow diagram.                    | Page 6<br>Line 149-152             |
| Characteristics of sources of evidence        | 15   | For each source of evidence, present characteristics for which data were charted and provide the citations.                                                                                     | Not applicable, this is a protocol |
| Critical appraisal within sources of evidence | 16   | If done, present data on critical appraisal of included sources of evidence (see item 12).                                                                                                      | Not applicable, this is a protocol |
| Results of individual sources of evidence     | 17   | For each included source of evidence, present the relevant data that were charted that relate to the review questions and objectives.                                                           | Not applicable, this is a protocol |
| Synthesis of results                          | 18   | Summarize and/or present the charting results as they relate to the review questions and objectives.                                                                                            | Not applicable, this is a protocol |
| <b>DISCUSSION</b>                             |      |                                                                                                                                                                                                 |                                    |
| Summary of evidence                           | 19   | Summarize the main results (including an overview of concepts, themes, and types of evidence available), link to the review questions and objectives, and consider the relevance to key groups. | Not applicable, this is a protocol |
| Limitations                                   | 20   | Discuss the limitations of the scoping review process.                                                                                                                                          | Not applicable, this is a protocol |
| Conclusions                                   | 21   | Provide a general interpretation of the results with respect to the review questions and objectives, as well as potential implications and/or next steps.                                       | Not applicable, this is a protocol |
| <b>FUNDING</b>                                |      |                                                                                                                                                                                                 |                                    |
| Funding                                       | 22   | Describe sources of funding for the included sources of evidence, as well as sources of funding for the scoping review. Describe the role of the funders of the scoping review.                 | Page 10<br>Line 275-280            |

JBI = Joanna Briggs Institute; PRISMA-ScR = Preferred Reporting Items for Systematic reviews and Meta-Analyses extension for Scoping Reviews.

\* Where *sources of evidence* (see second footnote) are compiled from, such as bibliographic databases, social media platforms, and Web sites.

† A more inclusive/heterogeneous term used to account for the different types of evidence or data sources (e.g., quantitative and/or qualitative research, expert opinion, and policy documents) that may be eligible in a scoping review as opposed to only studies. This is not to be confused with *information sources* (see first footnote).

‡ The frameworks by Arksey and O'Malley (6) and Levac and colleagues (7) and the JBI guidance (4, 5) refer to the process of data extraction in a scoping review as data charting.

§ The process of systematically examining research evidence to assess its validity, results, and relevance before using it to inform a decision. This term is used for items 12 and 19 instead of "risk of bias" (which is more applicable to systematic reviews of interventions) to include and acknowledge the various sources of evidence that may be used in a scoping review (e.g., quantitative and/or qualitative research, expert opinion, and policy document).

From: Tricco AC, Lillie E, Zarin W, O'Brien KK, Colquhoun H, Levac D, et al. PRISMA Extension for Scoping Reviews (PRISMA-ScR): Checklist and Explanation. *Ann Intern Med.* 2018;169:467–473. doi: 10.7326/M18-0850.

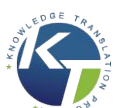

St. Michael's

Inspired Care.  
Inspiring Science.

For peer review only - <http://bmjopen.bmj.com/site/about/guidelines.xhtml>
